# Supplementary material for: Identification of Verrucarin A as a Potent and Selective Steroid Receptor Coactivator-3 Small Molecule Inhibitor
Source: PLoS One. 2014 Apr 17;9(4):e95243. doi: 10.1371/journal.pone.0095243 (PMC3990629; doi:10.1371/journal.pone.0095243)
Supplement: Table S1 — Summary of SRC inhibitor screening. (XLSX) [file pone.0095243.s004.xlsx]

## Sheet: Sheet1
Table S1. Summary of SRC inhibitor screening.
Target	PubChem Summary AID (1)	Screening Phase	Target	Replicates	Test mode	Test concentration	Selection criteria	Tested	Active	%Active	Z'	S/B
SRC-1	588362	Primary Screen	SRC-1	1	single dose	3.6 uM	>60.84% inhibition	359498	428	0.00119055	0.65±0.08	31.92±10.18
		Confirmation	SRC-1	3	single dose	3.6 uM	>49.88% inhibition	2323	486	0.209212	0.51±0.07	25.21±2.06
		Counterscreen	VP16	3	single dose	3.6 uM	> 33.06% inhibition	2323	1126	0.484718	0.72±0.03	42.14±2.47
		Titration	SRC-1	4	10-point serial dilution	starting at 36 uM	<10uM	240	58	0.241667	0.50±0.12	31.09±3.06
		Counterscreen/Titration	VP16	4	10-point serial dilution	starting at 36 uM	<10uM	240	63	0.2625	0.64±0.04	61.23±6.31
SRC-2	651960	Primary Screen	SRC-2	1	single dose	8.9 uM	>52.21% inhibition	359245	620	0.00172584	0.59±0.05	32.65±3.57
		Confirmation	SRC-2	3	single dose	8.9 uM	>46.5% inhibition	1862	657	0.352846	0.52±0.08	96.04±9.13
		Counterscreen	VP16	3	single dose	8.9 uM	>35.3% inhibition	1862	423	0.227175	0.63±0.08	92.56±7.34
		Titration	SRC-2	4	10-point serial dilution	starting at 89 uM	<10uM	244	83	0.340164	0.60±0.02	45.36±4.68
		Counterscreen/Titration	VP16	4	10-point serial dilution	starting at 89 uM	<10uM	244	3	0.0122951	0.74±0.06	63.92±7.03
SRC-3	588357	Primary Screen	SRC-3	1	single dose	3.6 uM	>61.6% inhibition	359484	621	0.00172748	0.66±0.06	26.71±3.43
		Confirmation	SRC-3	3	single dose	3.6 uM	>43.08% inhibition	3301	864	0.261739	0.54±0.04	56.12±3.59
		Counterscreen	VP16	3	single dose	3.6 uM	>29.4% inhibition	2301	1197	0.520209	0.71±0.09	44.59±5.31
		Titration	SRC-3	4	10-point serial dilution	starting at 36 uM	<10uM	229	119	0.519651	0.50±0.11	40.88±2.38
		Counterscreen/Titration	VP16	4	10-point serial dilution	starting at 36 uM	<10uM	229	84	0.366812	0.78±0.03	56.09±3.38
(1)to access the relevant information, add the PubChem AID at the end of this link: https://pubchem.ncbi.nlm.nih.gov/assay/assay.cgi?aid=
